# Supplementary material for: Pentadecanoic Acid (C15:0), an Essential Fatty Acid, Shares Clinically Relevant Cell-Based Activities with Leading Longevity-Enhancing Compounds
Source: Preprints.org preprint supplement (doi:10.20944/preprints202310.0508.v1), 2023-10-09
Supplement: Supplementary file 1 [file supplementary]

## Sheet: Summary
BioMAP Viewer Data	Dosing	Annotated Activities								Maximum biomarker hits (concentration)	Cytotoxicity
		Readout Number	Antiproliferative	Inflammation-related (decreased)	Inflammation-related (increased)	Immunomodulatory	Tissue remodeling	Hemostasis-related activities	Other activities
Acarbose	1.1, 3.3, 10, 30 uM	5	Fibroblasts (1.1, 3.3, 10 uM)	None	Eotaxin 3	None	Decreased Collagen IV, TIMP-1, uPAR, EGFR	None	None	28 (30 uM)	None
Metformin hydrochloride	190, 560, 1700, 5000 uM	17	T cells (5000 uM)	E-selectin, MCP-1, IP-10, IL-8	IL-1alpha, sPGE2	Decreased CD40, HLA-DR, CD38, CD69	Decreased tPA, Collagen-III, MMP-9	None	None	53 (5000 uM)	None
Sirolimus (rapamycin)	0.3, 1, 3, 9 uM	32	B cells, T cells, coronary artery smooth muscle cells, endothelial cells, fibroblasts (all doses)	VCAM-1, MCP-1, sTNFα	Eotaxin 3, IL-8, sPGE2	Decreased CD40, IL-10, sIgG, HLA-DR, IL-17A, CD38, IL-6, IL-17F, IL-2	Decreased tPA, PAI-1, EGFR, modulated uPAR	Increased TF	None	75 (9 uM)	None
Pentadecanoic acid (fatty15)	1.9, 5.6, 17, 50 uM	36	T cells (5.6, 17, 50 uM), coronary artery smooth muscle cells (1.9 uM), endothelial cells (17, 50 uM), fibroblasts (all doses)	VCAM-1, IP-10, Eotaxin 3, IL-1α, ITAC, MCP-1, MIG, IL-6	MIP-1, E-selectin	Decreased CD69, HLA-DR, sIgG, CD38, CD40, sIL-17F	Decreased TIMP1, PAI-1, Collagen-1, tPA, decorin. Increased TIMP2	Modulated TF, TM	Decreased VEGFR2	81 (17 uM)	None
All were noncytotoxic at all concentrations

## Sheet: Comp Top Conc
BioMAP Viewer Data	3C:CCL2/MCP-1	3C:CD106/VCAM-1	3C:CD141/Thrombomodulin	3C:CD142/Tissue Factor	3C:CD54/ICAM-1	3C:CD62E/E-Selectin	3C:CD87/uPAR	3C:CXCL8/IL-8	3C:CXCL9/MIG	3C:HLA-DR	3C:Proliferation	3C:SRB	4H:CCL2/MCP-1	4H:CCL26/Eotaxin-3	4H:CD106/VCAM-1	4H:CD62P/P-selectin	4H:CD87/uPAR	4H:SRB	4H:VEGFR2	LPS:CCL2/MCP-1	LPS:CD106/VCAM-1	LPS:CD141/Thrombomodulin	LPS:CD142/Tissue Factor	LPS:CD40	LPS:CD62E/E-Selectin	LPS:CD69	LPS:CXCL8/IL-8	LPS:IL-1alpha	LPS:M-CSF	LPS:sPGE2	LPS:SRB	LPS:sTNF-alpha	SAg:CCL2/MCP-1	SAg:CD38	SAg:CD40	SAg:CD62E/E-Selectin	SAg:CD69	SAg:CXCL8/IL-8	SAg:CXCL9/MIG	SAg:PBMC Cytotoxicity	SAg:Proliferation	SAg:SRB	BT:B cell Proliferation	BT:PBMC Cytotoxicity	BT:Secreted IgG	BT:sIL-17A	BT:sIL-17F	BT:sIL-2	BT:sIL-6
Acarbose, 30000 nM	0.0243006	-0.00191057	0.0276458	0.064364	-0.0398563	-0.0304546	-0.0361757	0.0140454	-0.00158955	-0.0230928	-0.0521343	-0.00309501	-0.0800505	-0.029597	-0.0102659	0.00133374	-0.0335835	-0.0130123	0.0409473	0.0557376	-0.0197974	0.00264095	-0.0238751	-0.0639807	-0.0312394	-0.0817105	0.00694545	0.0602046	0.0391056	0.0141236	-0.00422184	0.0454968	-0.00563117	0.0239936	-0.0484394	0.139847	-0.0123591	0.0642861	-0.00028215	0.00471477	0.0828169	-0.014942	0.0170825	-0.0212113	-0.0468027	-0.0219566	0.0225625	0.0632577	-0.0336191
Metformin Hydrochloride, 5000000 nM	-0.0542072	0.00126229	0.0138133	-0.0830764	0.00452837	-0.0793923	-0.125913	-0.151181	-0.00061061	-0.271283	-0.0286286	-0.0424866	-0.0266321	-0.0407221	-0.00647988	-0.103973	-0.0690446	-0.0171974	-0.0707578	-0.0956472	-0.0212489	-0.0577525	-0.0636649	-0.13131	-0.0916174	-0.110976	-0.0408007	0.159975	-0.0303523	0.215383	-0.0322458	0.148171	-0.0750347	-0.122012	-0.13801	-0.0947278	-0.125425	-0.146925	0.00315129	0.0496374	-0.160455	-0.0243843	-0.00521273	0.00248449	-0.491769	-0.12599		-0.0621047	-0.108684
Sirolimus, 9000 nM	-0.0988072	-0.129149	-0.0196284	0.0653549	-0.0330541	-0.0556323	-0.247249	-0.0501796	-0.0197842	-0.258736	-0.367091	-0.204857	-0.211442	-0.0435544	-0.0306808	-0.00469976	0.00903478	-0.180038	0.0405378	-0.104631	-0.0977513	-0.0922502	0.141778	-0.232563	-0.00658807	0.045741	-0.0513678	-0.0453632	-0.0980825	0.232811	-0.176659	0.00423255	-0.151334	-0.133476	-0.176983	0.0419885	-0.00768247	0.0082859	-0.00184359	-0.0664924	-0.370003	-0.139147	-0.448328	-0.128738	-1.67297	-0.86224	-0.619307	-0.463668	-0.510597
SRP_ETI-101-AVA, 17000 nM	-0.211703	-0.0278702	0.100409	0.0737862	-0.0247034	0.0502338	-0.0496449	-0.122235	-0.0135537	-0.255263	-0.570133	-0.235669	0.0102493	-0.383011	-0.0513759	0.00754173	-0.0819922	-0.012111	-0.153563	-0.262077	-0.0982606	0.115864	0.245342	-0.21584	0.0307448	-0.21366	0.0267486	-0.212755	-0.0607932	0.081391	-0.102865	0.035935	-0.0852906	-0.12804	-0.109877	0.00343398	-0.140502	0.0859691	-0.00241104	-0.0013566	-0.511434	-0.140665	0.0114664	0.140987	-0.416179	-0.190446	-0.108933	-0.101419	0.0308337
[truncated: 99 more columns]

## Sheet: Top Comp - All Sig
BioMAP Viewer Data	Acarbose (30 uM)	Metformin Hydrochloride (5000 uM)	Rapamycin (9 uM)	Fatty15 (17 uM)
3C:CCL2/MCP-1	0.0243006	-0.0542072	-0.0988072	-0.211703
3C:CD106/VCAM-1	-0.00191057	0.00126229	-0.129149	-0.0278702
3C:CD141/Thrombomodulin	0.0276458	0.0138133	-0.0196284	0.100409
3C:CD142/Tissue Factor	0.064364	-0.0830764	0.0653549	0.0737862
3C:CD54/ICAM-1	-0.0398563	0.00452837	-0.0330541	-0.0247034
3C:CD62E/E-Selectin	-0.0304546	-0.0793923	-0.0556323	0.0502338
3C:CD87/uPAR	-0.0361757	-0.125913	-0.247249	-0.0496449
3C:CXCL8/IL-8	0.0140454	-0.151181	-0.0501796	-0.122235
3C:HLA-DR	-0.0230928	-0.271283	-0.258736	-0.255263
3C:Proliferation	-0.0521343	-0.0286286	-0.367091	-0.570133
3C:SRB	-0.00309501	-0.0424866	-0.204857	-0.235669
4H:CCL2/MCP-1	-0.0800505	-0.0266321	-0.211442	0.0102493
4H:CCL26/Eotaxin-3	-0.029597	-0.0407221	-0.0435544	-0.383011
4H:CD106/VCAM-1	-0.0102659	-0.00647988	-0.0306808	-0.0513759
4H:CD62P/P-selectin	0.00133374	-0.103973	-0.00469976	0.00754173
4H:CD87/uPAR	-0.0335835	-0.0690446	0.00903478	-0.0819922
4H:SRB	-0.0130123	-0.0171974	-0.180038	-0.012111
4H:VEGFR2	0.0409473	-0.0707578	0.0405378	-0.153563
LPS:CCL2/MCP-1	0.0557376	-0.0956472	-0.104631	-0.262077
LPS:CD106/VCAM-1	-0.0197974	-0.0212489	-0.0977513	-0.0982606
LPS:CD141/Thrombomodulin	0.00264095	-0.0577525	-0.0922502	0.115864
LPS:CD142/Tissue Factor	-0.0238751	-0.0636649	0.141778	0.245342
LPS:CD40	-0.0639807	-0.13131	-0.232563	-0.21584
LPS:CD62E/E-Selectin	-0.0312394	-0.0916174	-0.00658807	0.0307448
LPS:CD69	-0.0817105	-0.110976	0.045741	-0.21366
LPS:IL-1alpha	0.0602046	0.159975	-0.0453632	-0.212755
LPS:M-CSF	0.0391056	-0.0303523	-0.0980825	-0.0607932
LPS:sPGE2	0.0141236	0.215383	0.232811	0.081391
LPS:SRB	-0.00422184	-0.0322458	-0.176659	-0.102865
LPS:sTNF-alpha	0.0454968	0.148171	0.00423255	0.035935
SAg:CCL2/MCP-1	-0.00563117	-0.0750347	-0.151334	-0.0852906
SAg:CD38	0.0239936	-0.122012	-0.133476	-0.12804
SAg:CD40	-0.0484394	-0.13801	-0.176983	-0.109877
SAg:CD62E/E-Selectin	0.139847	-0.0947278	0.0419885	0.00343398
SAg:CD69	-0.0123591	-0.125425	-0.00768247	-0.140502
SAg:CXCL8/IL-8	0.0642861	-0.146925	0.0082859	0.0859691
SAg:PBMC Cytotoxicity	0.00471477	0.0496374	-0.0664924	-0.0013566
SAg:Proliferation	0.0828169	-0.160455	-0.370003	-0.511434
SAg:SRB	-0.014942	-0.0243843	-0.139147	-0.140665
BT:B cell Proliferation	0.0170825	-0.00521273	-0.448328	0.0114664
BT:PBMC Cytotoxicity	-0.0212113	0.00248449	-0.128738	0.140987
BT:Secreted IgG	-0.0468027	-0.491769	-1.67297	-0.416179
BT:sIL-17A	-0.0219566	-0.12599	-0.86224	-0.190446
BT:sIL-17F	0.0225625		-0.619307	-0.108933
BT:sIL-2	0.0632577	-0.0621047	-0.463668	-0.101419
BT:sIL-6	-0.0336191	-0.108684	-0.510597	0.0308337
BT:sTNF-alpha	0.0403899	-0.110509	-0.391446	-0.116279
BF4T:CCL2/MCP-1	0.019629	-0.159797	-0.022233	-0.0360726
BF4T:CCL26/Eotaxin-3	-0.0627509	-0.108214	-0.0904247	-0.0254237
BF4T:CD106/VCAM-1	0.0889533	-0.0826971	-0.112384	-0.029187
BF4T:CD54/ICAM-1	0.0137818	-0.0168537	0.0116961	0.0429393
BF4T:CD90	0.0111022	-0.00162638	-0.0683886	0.042445
BF4T:CXCL8/IL-8	0.00072213	-0.118727	0.0826776	0.00619421
BF4T:IL-1alpha	0.0614875	-0.0330384	0.0104674	-0.0241305
BF4T:Keratin 8/18	0.0800182	-0.0413275	0.0635498	-0.00104546
BF4T:MMP-1	-0.00840452	-0.0223543	0.0409747	0.00212024
BF4T:MMP-3	0.00793721	-0.148356	0.0237548	-0.0204277
BF4T:MMP-9	0.0424934	-0.0986544	0.00590804	-0.0845557
BF4T:PAI-I	0.00942975	-0.0882444	-0.0716423	-0.0495163
BF4T:tPA	-9.838e-05	-0.141266	-0.156013	-0.00914338
BF4T:uPA	0.0277067	-0.0918705	0.0153785	-0.00966601
BE3C:CD54/ICAM-1	0.0193771	-0.0199099	0.00621174	-0.0452702
BE3C:CD87/uPAR	-0.0183857	-0.0238119	0.0396118	0.0968551
BE3C:CXCL10/IP-10	-0.0136146	-0.0734887	-0.0861538	-0.0923632
BE3C:CXCL11/I-TAC	0.00041576	-0.0188253	0.0162179	-0.0581674
BE3C:CXCL8/IL-8	0.0152009	-0.100358	-0.0496428	0.0504775
BE3C:EGFR	0.0476398	-0.0158042	-0.0274007	-0.0573963
BE3C:HLA-DR	0.0381906	-0.119043	-0.0818045	-0.0828617
BE3C:Keratin 8/18	0.0674435	0.00575726	0.0731711	0.0112245
BE3C:MMP-1	0.0504319	-0.0331026	0.136121	0.0902405
BE3C:MMP-9	0.089937	-0.111349	-0.0841956	-0.0329168
BE3C:PAI-I	0.0136625	-0.0143533	-0.106889	-0.120892
BE3C:tPA	0.0115219	-0.0994947	-0.088041	-0.123703
CASM3C:CD106/VCAM-1	-0.100481	-0.00391811	0.018561	-0.184505
CASM3C:CD141/Thrombomodulin	0.0122761	-0.084878	0.00119476	-0.132311
CASM3C:CD142/Tissue Factor	0.0121921	-0.0512373	-0.0805009	-0.207125
CASM3C:CD87/uPAR	-0.0885567	-0.0233217	-0.128632	0.00189332
CASM3C:HLA-DR	0.0107474	-0.0387407	-0.106309	-0.144437
CASM3C:LDLR	0.00717412	-0.0160316	-0.00081021	0.0542338
CASM3C:PAI-I	-0.0619199	-0.0118139	-0.0242758	-0.00994261
CASM3C:Proliferation	-0.0049156	-0.0227404	-0.23248	-0.0684574
CASM3C:SRB	-0.070416	0.00520728	-0.0743159	-0.0311071
HDF3CGF:CCL2/MCP-1	-0.0303941	-0.016715	0.0177965	-0.113626
HDF3CGF:CD106/VCAM-1	0.0135424	-0.163737	-0.0284007	-0.191736
HDF3CGF:Collagen I	-0.078939	-0.0282068	-0.0643648	-0.0683546
HDF3CGF:Collagen III	-0.0390291	-0.114182	-0.0723586	-0.0152877
HDF3CGF:CXCL10/IP-10	-0.00088492	-0.0542897	-0.044069	-0.291887
HDF3CGF:CXCL11/I-TAC	-0.0464552	-0.0461562	-0.0531995	-0.151136
HDF3CGF:CXCL8/IL-8	-0.00797514	-0.00628404	0.00055408	0.0502317
HDF3CGF:CXCL9/MIG	-0.0035391	-0.0131708	-0.00270329	-0.206458
HDF3CGF:EGFR	-0.118639	0.0891184	-0.133247	-0.0812344
HDF3CGF:M-CSF	-0.0389594	-0.0404202	-0.0633478	0.0246085
HDF3CGF:MMP-1	-0.0448328	0.00600161	-0.0107761	-0.00329925
HDF3CGF:PAI-I	-0.097271	0.0835852	-0.218807	-0.163423
HDF3CGF:Proliferation_72hr	-0.0532707	-0.0916646	-0.414002	-0.797249
HDF3CGF:SRB	-0.0262246	0.018151	-0.0517204	0.0299632
HDF3CGF:TIMP-2	-0.0866765	-0.0203207	-0.0433062	0.0746556
KF3CT:CCL2/MCP-1	-0.0651737	-0.00490429	0.0928137	-0.0885963
KF3CT:CD54/ICAM-1	0.0666674	0.0201641	0.0540272	-0.0428357
KF3CT:CXCL10/IP-10	-0.00011951	-0.00151091	-0.0821307	-0.0474502
KF3CT:CXCL8/IL-8	-0.0133927	-0.0608958	0.0932403	-0.0448085
KF3CT:PAI-I	-0.0548348		-0.234456	-0.167955
KF3CT:uPA	-0.048357	0.0142123	0.00399392	-0.0274726
MyoF:alpha-SM Actin	-0.00462983	-0.00137578	-0.0641639	0.00137251
MyoF:bFGF	0.00630338	-0.00191515	-0.0131132	-0.0381295
MyoF:CD106/VCAM-1	0.01379	-0.0211709	-0.153886	-0.299484
MyoF:Collagen I	0.0231541	-0.0143971	-0.0333403	-0.250108
MyoF:Collagen III	0.0112658	0.00084753	-0.0414585	-0.12555
MyoF:Collagen IV	-0.11587	0.0230745	0.0620114	0.113262
MyoF:CXCL8/IL-8	-0.0378548	0.00352717	0.161143	0.03194
MyoF:Decorin	0.00632952	-0.032463	0.00931969	-0.181718
MyoF:PAI-I	0.00886755		-0.0632108	-0.0393067
MyoF:SRB	-0.00944182	0.00443691	-0.0864294	-0.0473109
MyoF:TIMP-1	-0.122948	-0.0162306	-0.0210844	-0.155613
lMphg:CCL2/MCP-1	0.0673358	-0.125755	-0.0442786	-0.0924491
lMphg:CCL3/MIP-1alpha	-0.00100247	-0.0151647	-0.0665531	0.187852
lMphg:CD106/VCAM-1	0.00499964	-0.0471759	-0.0633061	-0.0748161
lMphg:CD40	0.0147403	-0.0595503	-0.0126811	-0.153578
lMphg:CD62E/E-Selectin	-0.00956796	-0.228675	-0.108191	0.179423
lMphg:CD69	-0.0226304	-0.0816372	-0.0237737	-0.179182
lMphg:CXCL8/IL-8	0.0413646	-0.130773	0.0716829	0.0405905
lMphg:sIL-10	-0.0392431		-0.284075	-0.108101
lMphg:SRB	-0.0211334	0.0017103	-0.0506445	0.00333443
lMphg:SRB-Mphg	-0.0626379	-0.0128916	-0.0486372	-0.0358183

## Sheet: Comp Sig Only
BioMAP Viewer Data	Acarbose (30 uM)	Metformin Hydrochloride (5000 uM)	Rapamycin (9 uM)	Fatty15 (17 uM)
3C:CCL2/MCP-1		-0.0542072	-0.0988072	-0.211703
3C:CD106/VCAM-1			-0.129149
3C:CD141/Thrombomodulin				0.100409
3C:CD142/Tissue Factor	0.064364	-0.0830764	0.0653549	0.0737862
3C:CD54/ICAM-1	-0.0398563		-0.0330541
3C:CD62E/E-Selectin		-0.0793923	-0.0556323	0.0502338
3C:CD87/uPAR		-0.125913	-0.247249
3C:CXCL8/IL-8		-0.151181		-0.122235
3C:HLA-DR		-0.271283	-0.258736	-0.255263
3C:Proliferation			-0.367091	-0.570133
3C:SRB		-0.0424866	-0.204857	-0.235669
4H:CCL2/MCP-1			-0.211442
4H:CCL26/Eotaxin-3				-0.383011
4H:CD106/VCAM-1				-0.0513759
4H:CD62P/P-selectin		-0.103973
4H:CD87/uPAR				-0.0819922
4H:SRB			-0.180038
4H:VEGFR2				-0.153563
LPS:CCL2/MCP-1	0.0557376	-0.0956472	-0.104631	-0.262077
LPS:CD106/VCAM-1			-0.0977513	-0.0982606
LPS:CD141/Thrombomodulin		-0.0577525	-0.0922502	0.115864
LPS:CD142/Tissue Factor			0.141778	0.245342
LPS:CD40		-0.13131	-0.232563	-0.21584
LPS:CD62E/E-Selectin		-0.0916174
LPS:CD69	-0.0817105	-0.110976		-0.21366
LPS:IL-1alpha		0.159975		-0.212755
LPS:M-CSF			-0.0980825
LPS:sPGE2		0.215383	0.232811	0.081391
LPS:SRB			-0.176659	-0.102865
LPS:sTNF-alpha		0.148171
SAg:CCL2/MCP-1		-0.0750347	-0.151334	-0.0852906
SAg:CD38		-0.122012	-0.133476	-0.12804
SAg:CD40		-0.13801	-0.176983	-0.109877
SAg:CD62E/E-Selectin	0.139847	-0.0947278
SAg:CD69		-0.125425		-0.140502
SAg:CXCL8/IL-8		-0.146925		0.0859691
SAg:PBMC Cytotoxicity		0.0496374	-0.0664924
SAg:Proliferation	0.0828169	-0.160455	-0.370003	-0.511434
SAg:SRB			-0.139147	-0.140665
BT:B cell Proliferation			-0.448328
BT:PBMC Cytotoxicity			-0.128738	0.140987
BT:Secreted IgG		-0.491769	-1.67297	-0.416179
BT:sIL-17A			-0.86224	-0.190446
BT:sIL-17F			-0.619307	-0.108933
BT:sIL-2			-0.463668
BT:sIL-6		-0.108684	-0.510597
BT:sTNF-alpha		-0.110509	-0.391446	-0.116279
BF4T:CCL2/MCP-1		-0.159797
BF4T:CCL26/Eotaxin-3		-0.108214	-0.0904247
BF4T:CD106/VCAM-1	0.0889533	-0.0826971	-0.112384
BF4T:CD54/ICAM-1				0.0429393
BF4T:CD90			-0.0683886	0.042445
BF4T:CXCL8/IL-8		-0.118727	0.0826776
BF4T:IL-1alpha	0.0614875
BF4T:Keratin 8/18	0.0800182		0.0635498
BF4T:MMP-1			0.0409747
BF4T:MMP-3		-0.148356
BF4T:MMP-9		-0.0986544		-0.0845557
BF4T:PAI-I		-0.0882444	-0.0716423	-0.0495163
BF4T:tPA		-0.141266	-0.156013
BF4T:uPA		-0.0918705
BE3C:CD54/ICAM-1				-0.0452702
BE3C:CD87/uPAR				0.0968551
BE3C:CXCL10/IP-10		-0.0734887	-0.0861538	-0.0923632
BE3C:CXCL11/I-TAC				-0.0581674
BE3C:CXCL8/IL-8		-0.100358
BE3C:EGFR	0.0476398			-0.0573963
BE3C:HLA-DR		-0.119043	-0.0818045	-0.0828617
BE3C:Keratin 8/18	0.0674435		0.0731711
BE3C:MMP-1	0.0504319		0.136121	0.0902405
BE3C:MMP-9	0.089937	-0.111349	-0.0841956
BE3C:PAI-I			-0.106889	-0.120892
BE3C:tPA		-0.0994947	-0.088041	-0.123703
CASM3C:CD106/VCAM-1	-0.100481			-0.184505
CASM3C:CD141/Thrombomodulin		-0.084878		-0.132311
CASM3C:CD142/Tissue Factor			-0.0805009	-0.207125
CASM3C:CD87/uPAR	-0.0885567		-0.128632
CASM3C:HLA-DR			-0.106309	-0.144437
CASM3C:LDLR				0.0542338
CASM3C:PAI-I	-0.0619199
CASM3C:Proliferation			-0.23248	-0.0684574
CASM3C:SRB	-0.070416		-0.0743159
HDF3CGF:CCL2/MCP-1				-0.113626
HDF3CGF:CD106/VCAM-1		-0.163737		-0.191736
HDF3CGF:Collagen I	-0.078939
HDF3CGF:Collagen III		-0.114182
HDF3CGF:CXCL10/IP-10				-0.291887
HDF3CGF:CXCL11/I-TAC			-0.0531995	-0.151136
HDF3CGF:CXCL8/IL-8				0.0502317
HDF3CGF:CXCL9/MIG				-0.206458
HDF3CGF:EGFR	-0.118639	0.0891184	-0.133247	-0.0812344
HDF3CGF:M-CSF			-0.0633478
HDF3CGF:MMP-1	-0.0448328
HDF3CGF:PAI-I	-0.097271	0.0835852	-0.218807	-0.163423
HDF3CGF:Proliferation_72hr		-0.0916646	-0.414002	-0.797249
HDF3CGF:SRB			-0.0517204
HDF3CGF:TIMP-2	-0.0866765			0.0746556
KF3CT:CCL2/MCP-1			0.0928137	-0.0885963
KF3CT:CD54/ICAM-1	0.0666674		0.0540272	-0.0428357
KF3CT:CXCL10/IP-10			-0.0821307	-0.0474502
KF3CT:CXCL8/IL-8		-0.0608958	0.0932403
KF3CT:PAI-I	-0.0548348		-0.234456	-0.167955
KF3CT:uPA	-0.048357
MyoF:alpha-SM Actin			-0.0641639
MyoF:bFGF				-0.0381295
MyoF:CD106/VCAM-1			-0.153886	-0.299484
MyoF:Collagen I				-0.250108
MyoF:Collagen III			-0.0414585	-0.12555
MyoF:Collagen IV	-0.11587			0.113262
MyoF:CXCL8/IL-8			0.161143
MyoF:Decorin				-0.181718
MyoF:PAI-I			-0.0632108
MyoF:SRB			-0.0864294	-0.0473109
MyoF:TIMP-1	-0.122948			-0.155613
lMphg:CCL2/MCP-1		-0.125755		-0.0924491
lMphg:CCL3/MIP-1alpha				0.187852
lMphg:CD106/VCAM-1		-0.0471759	-0.0633061	-0.0748161
lMphg:CD40				-0.153578
lMphg:CD62E/E-Selectin		-0.228675	-0.108191	0.179423
lMphg:CD69		-0.0816372		-0.179182
lMphg:CXCL8/IL-8		-0.130773	0.0716829
lMphg:sIL-10			-0.284075	-0.108101
lMphg:SRB			-0.0506445
lMphg:SRB-Mphg	-0.0626379

## Sheet: S1 Profile Data
Pentadecanoic acid (C15:0), an essential fatty acid, shares clinically relevant cell-based activities with leading longevity-enhancing compounds
Venn-Watson & Schork, Nutrients (2023)
BioMAP® Diversity PLUS® measured changes across 12 primary human cell systems with 148 clinically-relevant biomarkers compared to non-treated control systems for acarbose, metformin, rapamycin and C15:0 (FA15) at four doses
Blue = Statistically signficant change outside non-treated control envelope
BioMAP Viewer Data	3C:CCL2/MCP-1	3C:CD106/VCAM-1	3C:CD141/Thrombomodulin	3C:CD142/Tissue Factor	3C:CD54/ICAM-1	3C:CD62E/E-Selectin	3C:CD87/uPAR	3C:CXCL8/IL-8	3C:CXCL9/MIG	3C:HLA-DR	3C:Proliferation	3C:SRB	4H:CCL2/MCP-1	4H:CCL26/Eotaxin-3	4H:CD106/VCAM-1	4H:CD62P/P-selectin	4H:CD87/uPAR	4H:SRB	4H:VEGFR2	LPS:CCL2/MCP-1	LPS:CD106/VCAM-1	LPS:CD141/Thrombomodulin	LPS:CD142/Tissue Factor	LPS:CD40	LPS:CD62E/E-Selectin	LPS:CD69	LPS:CXCL8/IL-8	LPS:IL-1alpha	LPS:M-CSF	LPS:sPGE2	LPS:SRB	LPS:sTNF-alpha	SAg:CCL2/MCP-1	SAg:CD38	SAg:CD40	SAg:CD62E/E-Selectin	SAg:CD69	SAg:CXCL8/IL-8	SAg:CXCL9/MIG	SAg:PBMC Cytotoxicity	SAg:Proliferation	SAg:SRB	BT:B cell Proliferation	BT:PBMC Cytotoxicity	BT:Secreted IgG	BT:sIL-17A	BT:sIL-17F	BT:sIL-2	BT:sIL-6
Acarbose, 30000 nM	0.0243006	-0.00191057	0.0276458	0.064364	-0.0398563	-0.0304546	-0.0361757	0.0140454	-0.00158955	-0.0230928	-0.0521343	-0.00309501	-0.0800505	-0.029597	-0.0102659	0.00133374	-0.0335835	-0.0130123	0.0409473	0.0557376	-0.0197974	0.00264095	-0.0238751	-0.0639807	-0.0312394	-0.0817105	0.00694545	0.0602046	0.0391056	0.0141236	-0.00422184	0.0454968	-0.00563117	0.0239936	-0.0484394	0.139847	-0.0123591	0.0642861	-0.00028215	0.00471477	0.0828169	-0.014942	0.0170825	-0.0212113	-0.0468027	-0.0219566	0.0225625	0.0632577	-0.0336191
Acarbose, 10000 nM	0.0337566	-0.00283242	-0.00733775	0.0416987	-0.0114962	-0.0218182	0.0244993	0.0063425	-0.00069569	0.0273717	0.0183057	-0.00831781	-0.12289	-0.00679528	0.00960408	-0.0472326	-0.112765	-0.0363714	-0.0253114	0.0334223	-0.0328952	-0.00102401	0.0285978	-0.0377468	-0.0247653	-0.0279107	-0.0212167	0.00588847	0.0254416	0.0174039	-0.0462013	-0.021854	0.00215598	-0.0283913	-0.0360042	-0.00990902	-0.00879286	-0.0640538	-0.00247243	-0.0830989	0.0802695	-0.0749769	0.0314234	-0.00360444	0.0734394	0.0673997	0.0166496	0.0119303	-0.0214654
Acarbose, 3300 nM	0.0257917	0.0191067	0.0412905	0.0572901	-0.00420765	0.0375039	0.0843028	0.0202686	-0.00030384	0.0617098	-0.00798235	-0.0134592	-0.0877677	0.107644	0.0250434	0.0203649	-0.0660328	-0.0469423	0.0532729	-0.0558109	-0.0404369	0.0194274	0.041435	-0.0370823	-0.0413342	-0.0323012	-0.0192835	0.0175492	0.00618713	0.055988	-0.0722559	0.0160524	-0.0033127	-0.0235925	0.0559245	-0.0253474	0.0358867	-0.0908386	-0.00226874	-0.0932798	0.0905664	-0.0581946	0.0114042	-0.0149548	0.0819779	0.107908	0.00171455	-0.0162033	0.0542342
Acarbose, 1100 nM	0.0186627	0.0129555	0.0571444	0.0885675	0.0089329	0.0317334	0.0283185	-0.0160464	-0.00379937	0.0629461	0.018796	-0.0197396	-0.0526445	0.12956	0.030549	0.0272265	-0.111454	-0.0560005	0.0181073	-0.00722498	-0.0826575	0.024782	0.0417361	0.00440519	-0.0536659	-0.0206903	-0.00207288	0.0132347	0.014278	0.0561705	-0.0822777	0.0592093	-0.00885111	-0.0343039	0.0110634	0.0148287	0.0587085	0.0515686	-0.00195209	-0.0762946	-0.0430448	-0.0480298	-0.00726898	-0.027542	0.0990565	0.116515	0.00571089	-0.0455871	0.00145767
Metformin Hydrochloride, 5000000 nM	-0.0542072	0.00126229	0.0138133	-0.0830764	0.00452837	-0.0793923	-0.125913	-0.151181	-0.00061061	-0.271283	-0.0286286	-0.0424866	-0.0266321	-0.0407221	-0.00647988	-0.103973	-0.0690446	-0.0171974	-0.0707578	-0.0956472	-0.0212489	-0.0577525	-0.0636649	-0.13131	-0.0916174	-0.110976	-0.0408007	0.159975	-0.0303523	0.215383	-0.0322458	0.148171	-0.0750347	-0.122012	-0.13801	-0.0947278	-0.125425	-0.146925	0.00315129	0.0496374	-0.160455	-0.0243843	-0.00521273	0.00248449	-0.491769	-0.12599		-0.0621047	-0.108684
Metformin Hydrochloride, 1700000 nM	-0.0369173	-0.00734769	0.0142655	-0.00549059	-0.00458268	-0.05357	-0.0538472	-0.109631	-0.00797192	-0.168678	-0.0209931	-0.0148196	-0.0208049	-0.00246394	-0.0138643	-0.0642022	-0.0498155	0.00075952	-0.0522238	-0.071577	-0.0202823	-0.0382988	-0.0486095	-0.114343	-0.0641973	-0.0372321	-0.0151917	0.11921	-0.027857	0.190412	-0.00701733	0.0499078	-0.0349492	-0.0687861	-0.0565622	-0.0723463	-0.0692011	-0.0832031	-0.00648975	0.0633636	-0.0690583	-0.0108733	0.00218039	-0.00553972	-0.132033	-0.0588513		0.0249245	-0.0180128
Metformin Hydrochloride, 560000 nM	-0.00276578	-0.0095976	0.00168962	0.0393169	0.00194468	-0.0422341	-0.0245713	-0.0513053	-0.00253458	-0.058865	-0.00388516	0.0063403	-0.0412757	-0.00791936	-0.00531301	0.00317017	0.00052652	0.0199835	-0.0234253	-0.0448153	0.00361918	-0.0028926	-0.0505751	-0.0779776	-0.0422108	-0.024871	-0.0121555	0.0577315	-0.00789872	0.174988	0.0124842	0.0584094	0.00492942	-0.0516224	-0.0294848	-0.0333713	-0.0599128	-0.00864912	0.0021294	0.04462	0.00084841	0.0116014	0.00743765	0.00236203	-0.0174002	-0.0105849		0.0571403	0.101288
Metformin Hydrochloride, 190000 nM	0.0255202	-0.00232761	-0.00730814	0.0234892	-0.0210975	-0.0323219	-0.0371672	-0.012847	-0.00401687	-0.0606059	-0.0175763	0.00342207	0.0246192	-0.00900374	0.00622386	0.00508027	-0.0376768	0.0175009	-0.0229901	0.00777345	0.0114575	-0.0372461	-0.00926379	-0.0626622	-0.00381055	-0.0263508	0.00318879	0.0684109	0.0466511	0.155952	0.0136786	0.171299	0.0151658	-0.0278675	-0.0240852	-0.00688901	-0.0538292	-0.00695306	-0.0158292	0.0221915	0.0347297	0.0126603	-0.0168553	0.0151622	-0.284116	-0.0543877		0.119103	0.0681924
Sirolimus, 9000 nM	-0.0988072	-0.129149	-0.0196284	0.0653549	-0.0330541	-0.0556323	-0.247249	-0.0501796	-0.0197842	-0.258736	-0.367091	-0.204857	-0.211442	-0.0435544	-0.0306808	-0.00469976	0.00903478	-0.180038	0.0405378	-0.104631	-0.0977513	-0.0922502	0.141778	-0.232563	-0.00658807	0.045741	-0.0513678	-0.0453632	-0.0980825	0.232811	-0.176659	0.00423255	-0.151334	-0.133476	-0.176983	0.0419885	-0.00768247	0.0082859	-0.00184359	-0.0664924	-0.370003	-0.139147	-0.448328	-0.128738	-1.67297	-0.86224	-0.619307	-0.463668	-0.510597
Sirolimus, 3000 nM	-0.0727574	-0.0736568	0.0343418	0.102554	-0.0227984	-0.00852442	-0.0975092	-0.0580397	0.0195549	-0.105003	-0.392704	-0.109463	-0.178754	0.0389091	-0.019646	-0.0626941	0.106882	-0.12008	-0.0241554	-0.0703693	-0.0671296	-0.041057	0.152341	-0.116929	0.0264251	0.108613	-0.0544699	-0.0476915	-0.047336	0.216963	-0.145024	-0.00309268	-0.136698	-0.156266	-0.123096	0.0816264	0.0327946	-0.032549	0.0176804	-0.0631297	-0.257482	-0.102495	-0.385977	-0.0986095	-1.77882	-0.902698	-0.636909	-0.354386	-0.497044
Sirolimus, 1000 nM	-0.0431087	-0.0419206	-0.00302497	0.0900753	-0.0160584	-0.0165679	-0.127857	-0.0528843	0.021754	-0.130945	-0.214937	-0.089117	-0.0701584	0.0485672	-0.0019196	-0.0427775	0.102189	-0.0687038	-0.0350775	-0.0756292	-0.0708726	-0.0698754	0.0832043	-0.112148	0.023586	0.033159	0.00071412	-0.0623815	-0.0456949	0.188375	-0.0815742	0.0920809	-0.071415	-0.127031	-0.0964063	0.0749049	0.0605348	0.00699825	0.00862372	-0.035084	-0.264641	-0.0902528	-0.396624	-0.0876035	-1.79136	-0.929584	-0.663992	-0.294668	-0.482293
Sirolimus, 330 nM	-0.0636639	-0.0568239	-0.0229081	0.0628674	-0.0146299	0.00104962	-0.119584	-0.0461448	0.0262495	-0.100694	-0.32667	-0.103675	-0.173934	0.12709	0.0362773	-0.0793809	0.0427054	-0.0860223	-0.160049	-0.0566763	-0.0559368	-0.0893589	0.0929237	-0.116384	0.0294162	0.130553	-0.0226114	-0.0593052	-0.0425921	0.150895	-0.121445	0.0395448	-0.0802902	-0.123897	-0.0872302	0.0834399	0.0699942	0.0129183	0.0261033	-0.0437885	-0.256136	-0.0913872	-0.405444	-0.0924603	-1.81664	-0.92071	-0.694901	-0.271076	-0.544673
C15:0 (FA15), 50000 nM	-0.0077677	0.0130884	0.0253786	0.0510863	0.00583636	0.023845	0.107705	0.0366064	0.0152706	-0.00756928	-0.612423	-0.00135337	-0.0185398	-0.0843738	0.0125445	0.0792915	-0.0264749	0.0273293	0.03411	-0.0165225	0.0286062	0.0811015	0.243629	0.00956965	0.0868033	-0.119756	0.0346884	-0.00126653	0.131092	0.0430554	-0.0061882	0.044399	0.0214668	-0.0261127	-0.00651363	0.0530485	-0.0446217	0.165666	0.00978593	0.0735845	-0.274489	0.0102093	0.0348543	0.0608728	0.0467629	0.09166	0.0888313	0.101998	0.139839
C15:0 (FA15), 17000 nM	-0.211703	-0.0278702	0.100409	0.0737862	-0.0247034	0.0502338	-0.0496449	-0.122235	-0.0135537	-0.255263	-0.570133	-0.235669	0.0102493	-0.383011	-0.0513759	0.00754173	-0.0819922	-0.012111	-0.153563	-0.262077	-0.0982606	0.115864	0.245342	-0.21584	0.0307448	-0.21366	0.0267486	-0.212755	-0.0607932	0.081391	-0.102865	0.035935	-0.0852906	-0.12804	-0.109877	0.00343398	-0.140502	0.0859691	-0.00241104	-0.0013566	-0.511434	-0.140665	0.0114664	0.140987	-0.416179	-0.190446	-0.108933	-0.101419	0.0308337
C15:0 (FA15), 5600 nM	-0.0549619	-0.0123424	-0.00938349	0.0615518	-0.0124389	0.00831434	0.0834705	-0.0343475	-0.00733561	-0.0845492	-0.0165758	-0.0316653	-0.0295005	-0.255693	-0.0719624	-0.0568122	-0.0209267	0.00630703	-0.138188	-0.0875389	-0.0665938	0.0490805	0.224323	-0.0536386	0.0477364	-0.210345	-0.0530742	-0.0961519	-0.0137217	0.061684	-0.0199164	0.0283912	-0.031956	-0.140161	-0.0916152	0.00801547	-0.123214	0.000707128	-0.00625138	0.0365815	-0.175859	-0.00958962	0.0350491	0.185663	-0.150512	0.022253	-0.14985	-0.0433127	0.0604627
C15:0 (FA15), 1900 nM	-0.0147389	0.00431445	-0.0421073	-0.0110616	-0.0212021	-0.00398036	0.0701844	-0.00938581	-0.00500011	-0.0207732	-0.0228792	-0.0224613	-0.00521681	-0.118038	-0.0409463	-0.0419885	0.0347621	-0.0184282	-0.114906	-0.0149403	0.0238915	0.00826042	0.113509	-0.0162121	0.0446007	-0.0849936	-0.0788618	-0.0199264	-0.0283997	0.0794472	-0.0122886	0.04335	-0.00610933	-0.130705	-0.0488313	-0.00256767	-0.077033	-0.0741621	0.00295345	0.0156602	0.0752388	-0.00614477	0.0101652	0.0482061	0.0396158	-0.175598	-0.0527303	-0.104212	-0.0161271
[truncated: 99 more columns]

## Sheet: S2 Cytotoxicity
Pentadecanoic acid (C15:0), an essential fatty acid, shares clinically relevant cell-based activities with leading longevity-enhancing compounds
Venn-Watson & Schork, Nutrients (2023)
BioMAP® Diversity PLUS® cytotoxicity data for acarbose, metformin, rapamycin and C15:0 (FA15) at four doses
BioMAP Viewer Data	Cytotoxicity	3C:SRB	4H:SRB	LPS:SRB	SAg:PBMC Cytotoxicity	SAg:SRB	BT:PBMC Cytotoxicity	BF4T:SRB	BE3C:SRB	CASM3C:SRB	HDF3CGF:SRB	KF3CT:SRB	MyoF:SRB	lMphg:SRB	lMphg:SRB-Mphg
Acarbose, 30000 nM	0	0	0	0	0	0	0	0	0	0	0	0	0	0	0
Acarbose, 10000 nM	0	0	0	0	0	0	0	0	0	0	0	0	0	0	0
Acarbose, 3300 nM	0	0	0	0	0	0	0	0	0	0	0	0	0	0	0
Acarbose, 1100 nM	0	0	0	0	0	0	0	0	0	0	0	0	0	0	0
Metformin Hydrochloride, 5000000 nM	0	0	0	0	0	0	0	0	0	0	0	0	0	0	0
Metformin Hydrochloride, 1700000 nM	0	0	0	0	0	0	0	0	0	0	0	0	0	0	0
Metformin Hydrochloride, 560000 nM	0	0	0	0	0	0	0	0	0	0	0	0	0	0	0
Metformin Hydrochloride, 190000 nM	0	0	0	0	0	0	0	0	0	0	0	0	0	0	0
Sirolimus, 9000 nM	0	0	0	0	0	0	0	0	0	0	0	0	0	0	0
Sirolimus, 3000 nM	0	0	0	0	0	0	0	0	0	0	0	0	0	0	0
Sirolimus, 1000 nM	0	0	0	0	0	0	0	0	0	0	0	0	0	0	0
Sirolimus, 330 nM	0	0	0	0	0	0	0	0	0	0	0	0	0	0	0
C15:0 (FA15), 50000 nM	0	0	0	0	0	0	0	0	0	0	0	0	0	0	0
C15:0 (FA15), 17000 nM	0	0	0	0	0	0	0	0	0	0	0	0	0	0	0
C15:0 (FA15), 5600 nM	0	0	0	0	0	0	0	0	0	0	0	0	0	0	0
C15:0 (FA15), 1900 nM	0	0	0	0	0	0	0	0	0	0	0	0	0	0	0

## Sheet: S3 Biomarker Hits
Pentadecanoic acid (C15:0), an essential fatty acid, shares clinically relevant cell-based activities with leading longevity-enhancing compounds
Venn-Watson & Schork, Nutrients (2023)
BioMAP® Diversity PLUS® number of biomarker hits, by dose, for acarbose, metformin, rapamycin and C15:0 (FA15) at four doses
BioMAP Viewer Data	Biomarker Hits	3C:CCL2/MCP-1	3C:CD106/VCAM-1	3C:CD141/Thrombomodulin	3C:CD142/Tissue Factor	3C:CD54/ICAM-1	3C:CD62E/E-Selectin	3C:CD87/uPAR	3C:CXCL8/IL-8	3C:CXCL9/MIG	3C:HLA-DR	3C:Proliferation	3C:SRB	4H:CCL2/MCP-1	4H:CCL26/Eotaxin-3	4H:CD106/VCAM-1	4H:CD62P/P-selectin	4H:CD87/uPAR	4H:SRB	4H:VEGFR2	LPS:CCL2/MCP-1	LPS:CD106/VCAM-1	LPS:CD141/Thrombomodulin	LPS:CD142/Tissue Factor	LPS:CD40	LPS:CD62E/E-Selectin	LPS:CD69	LPS:CXCL8/IL-8	LPS:IL-1alpha	LPS:M-CSF	LPS:sPGE2	LPS:SRB	LPS:sTNF-alpha	SAg:CCL2/MCP-1	SAg:CD38	SAg:CD40	SAg:CD62E/E-Selectin	SAg:CD69	SAg:CXCL8/IL-8	SAg:CXCL9/MIG	SAg:PBMC Cytotoxicity	SAg:Proliferation	SAg:SRB	BT:B cell Proliferation	BT:PBMC Cytotoxicity	BT:Secreted IgG	BT:sIL-17A	BT:sIL-17F	BT:sIL-2
Acarbose, 30000 nM	28	0	0	0	1	1	0	0	0	0	0	0	0	0	0	0	0	0	0	0	1	0	0	0	0	0	1	0	0	0	0	0	0	0	0	0	1	0	0	0	0	1	0	0	0	0	0	0	0
Acarbose, 10000 nM	24	0	0	0	0	0	0	0	0	0	0	0	0	1	0	0	0	1	0	0	0	0	0	0	0	0	0	0	0	0	0	1	0	0	0	0	0	0	0	0	1	1	1	0	0	0	0	0	0
Acarbose, 3300 nM	27	0	0	0	0	0	0	1	0	0	1	0	0	0	1	0	0	0	1	0	1	0	0	0	0	0	0	0	0	0	0	1	0	0	0	0	0	0	1	0	1	1	1	0	0	0	0	0	0
Acarbose, 1100 nM	15	0	0	1	1	0	0	0	0	0	1	0	0	0	1	0	0	1	1	0	0	1	0	0	0	1	0	0	0	0	0	1	0	0	0	0	0	0	0	0	1	0	1	0	0	0	0	0	0
Metformin Hydrochloride, 5000000 nM	53	1	0	0	1	0	1	1	1	0	1	0	1	0	0	0	1	0	0	0	1	0	1	0	1	1	1	0	1	0	1	0	1	1	1	1	1	1	1	0	1	1	0	0	0	1	0		0
Metformin Hydrochloride, 1700000 nM	28	0	0	0	0	0	1	0	1	0	1	0	0	0	0	0	0	0	0	0	1	0	0	0	1	1	0	0	1	0	1	0	0	0	1	0	1	1	0	0	1	1	0	0	0	0	0		0
Metformin Hydrochloride, 560000 nM	5	0	0	0	0	0	0	0	0	0	1	0	0	0	0	0	0	0	0	0	0	0	0	0	0	0	0	0	0	0	1	0	0	0	1	0	0	0	0	0	1	0	0	0	0	0	0		0
Metformin Hydrochloride, 190000 nM	9	0	0	0	0	0	0	0	0	0	1	0	0	0	0	0	0	0	0	0	0	0	0	0	0	0	0	0	0	0	1	0	1	0	0	0	0	0	0	0	0	0	0	0	0	1	0		1
Sirolimus, 9000 nM	75	1	1	0	1	1	1	1	0	0	1	1	1	1	0	0	0	0	1	0	1	1	1	1	1	0	0	0	0	1	1	1	0	1	1	1	0	0	0	0	1	1	1	1	1	1	1	1	1
Sirolimus, 3000 nM	61	1	1	0	1	0	0	1	1	0	1	1	1	1	0	0	0	1	1	0	1	1	0	1	1	0	1	1	0	0	1	1	0	1	1	1	1	0	0	0	1	1	1	1	1	1	1	1	1
Sirolimus, 1000 nM	62	0	1	0	1	0	0	1	1	0	1	1	1	0	1	0	0	1	1	0	1	1	1	1	1	0	0	0	0	0	1	1	1	1	1	1	1	0	0	0	1	1	1	1	1	1	1	1	1
Sirolimus, 330 nM	55	1	1	0	1	0	0	1	0	0	1	1	1	1	1	0	1	0	1	1	1	1	1	1	1	0	1	0	0	0	1	1	0	1	1	1	1	1	0	0	1	1	1	1	1	1	1	1	1
C15:0 (FA15), 50000 nM	40	0	0	0	0	0	0	1	0	0	0	1	0	0	1	0	1	0	0	0	0	0	1	1	0	1	1	0	0	1	0	0	0	0	0	0	0	0	1	0	1	1	0	0	1	0	0	0	0
C15:0 (FA15), 17000 nM	81	1	0	1	1	0	1	0	1	0	1	1	1	0	1	1	0	1	0	1	1	1	1	1	1	0	1	0	1	0	1	1	0	1	1	1	0	1	1	0	0	1	1	0	1	1	1	1	0
C15:0 (FA15), 5600 nM	56	1	0	0	1	0	0	1	0	0	1	0	0	0	1	1	0	0	0	1	1	1	0	1	0	1	1	1	1	0	1	0	0	0	1	1	0	1	0	0	1	1	0	0	1	1	0	1	0
C15:0 (FA15), 1900 nM	28	0	0	0	0	0	0	1	0	0	0	0	0	0	1	1	0	0	0	1	0	0	0	1	0	0	1	1	0	0	1	0	0	0	1	0	0	1	0	0	0	1	0	0	1	0	1	0	0
[truncated: 100 more columns]

## Sheet: Envelope
Pentadecanoic acid (C15:0), an essential fatty acid, shares clinically relevant cell-based activities with leading longevity-enhancing compounds
Venn-Watson & Schork, Nutrients (2023)
BioMAP® Diversity PLUS® 95% confidence interval envelope data from non-treated control systems
BioMAP Viewer Data	3C:CCL2/MCP-1	3C:CD106/VCAM-1	3C:CD141/Thrombomodulin	3C:CD142/Tissue Factor	3C:CD54/ICAM-1	3C:CD62E/E-Selectin	3C:CD87/uPAR	3C:CXCL8/IL-8	3C:CXCL9/MIG	3C:HLA-DR	3C:Proliferation	3C:SRB	4H:CCL2/MCP-1	4H:CCL26/Eotaxin-3	4H:CD106/VCAM-1	4H:CD62P/P-selectin	4H:CD87/uPAR	4H:SRB	4H:VEGFR2	LPS:CCL2/MCP-1	LPS:CD106/VCAM-1	LPS:CD141/Thrombomodulin	LPS:CD142/Tissue Factor	LPS:CD40	LPS:CD62E/E-Selectin	LPS:CD69	LPS:CXCL8/IL-8	LPS:IL-1alpha	LPS:M-CSF	LPS:sPGE2	LPS:SRB	LPS:sTNF-alpha	SAg:CCL2/MCP-1	SAg:CD38	SAg:CD40	SAg:CD62E/E-Selectin	SAg:CD69	SAg:CXCL8/IL-8	SAg:CXCL9/MIG	SAg:PBMC Cytotoxicity	SAg:Proliferation	SAg:SRB	BT:B cell Proliferation	BT:PBMC Cytotoxicity	BT:Secreted IgG	BT:sIL-17A	BT:sIL-17F	BT:sIL-2	BT:sIL-6
Sig,0.95%,Screening	0.04831	0.03679	0.04641	0.0588	0.03009	0.04544	0.05386	0.05157	0.03012	0.04815	0.05657	0.04058	0.08856	0.04702	0.04029	0.07718	0.07075	0.04125	0.0717	0.05205	0.041	0.05188	0.06908	0.08059	0.04491	0.07935	0.05282	0.081	0.0614	0.05981	0.03832	0.08748	0.05752	0.04526	0.0567	0.07076	0.06808	0.08447	0.03809	0.03456	0.06537	0.03808	0.04573	0.03143	0.1366	0.15153	0.10327	0.10648	0.10114
	-0.04831	-0.03679	-0.04641	-0.0588	-0.03009	-0.04544	-0.05386	-0.05157	-0.03012	-0.04815	-0.05657	-0.04058	-0.08856	-0.04702	-0.04029	-0.07718	-0.07075	-0.04125	-0.0717	-0.05205	-0.041	-0.05188	-0.06908	-0.08059	-0.04491	-0.07935	-0.05282	-0.081	-0.0614	-0.05981	-0.03832	-0.08748	-0.05752	-0.04526	-0.0567	-0.07076	-0.06808	-0.08447	-0.03809	-0.03456	-0.06537	-0.03808	-0.04573	-0.03143	-0.1366	-0.15153	-0.10327	-0.10648	-0.10114
[truncated: 99 more columns]
